# Supplementary material for: An origin of the immunogenicity of in vitro transcribed RNA
Source: PubMed Central journal article supplement — Nucleic Acids Res. 2018 Mar 9;46(10):5239–49. doi: 10.1093/nar/gky177 (PMC6007322; doi:10.1093/nar/gky177), 2018-03-09
Supplement: gky177_supp.pdf [file gky177_supp.pdf]

**Table S1.** Sequences of the DNA templates used in this study\*

| DNA  | sequences (5'-3')                                                                                                                                                                                                                                                                                                                                                                                                                                                                                                                                                                                   |
|------|-----------------------------------------------------------------------------------------------------------------------------------------------------------------------------------------------------------------------------------------------------------------------------------------------------------------------------------------------------------------------------------------------------------------------------------------------------------------------------------------------------------------------------------------------------------------------------------------------------|
| 512A | TAATACGACTCACTATAGGGAGAATGTCGAATGGGTATTCCACAGAC<br>GAGAATTTCCGCTATCTCATCTCGTGCTTCAGGGCCAGGGTGAAAATG<br>TACATCCAGGTGGAGCCTGTGCTGGACTACCTGACCTTTCTGCCTGCA<br>GAGGTGAAGGAGCAGATTCAGAGGACAGTCGCCACCTCCGGGAACAT<br>GCAGGCAGTTGAACTGCTGCTGAGCACCTTGGAGAAGGGAGTCTGGC<br>ACCTTGTTGGACTCGGGAATTCGTGGAGGCCCTCCGGAGAACCGGC<br>AGCCCTCTGGCCGCCGCTACATGAACCCTGAGCTCACGGACTTGCCC<br>TCTCCATCGTTTGAGAACGCTCATGATGAATATCTCCAACCTGCTGAAC<br>CTCCTTCAGCCCCTCTGGTGGACAAGCTTCTAGTTAGAGACGTCTTG<br>GATAAGTGCATGGAGGAGGAAGTGTGACAATTGAAGACAGAAACCG<br>GATTGCTGCTGCAGAAAACAATGGAAATGAATCAGGTGTAAGAGAGC<br>TTCTCCC          |
| 512B | TAATACGACTCACTATAGGGAGAAGCTCTTTACACCTGATTCATTTT<br>CATTGTTTTCTGCAGCAGCAATCCGGTTTTCTGTCTTCAATTGTCAACAG<br>TTCTCCTCCATGCACTTATCCAAGACGTCTCTAACTAGAAGCTTGTCC<br>ACCAGAGTGGGCTGAAGGAGGTTTCAGCAGTTGGAGATATTCATCATG<br>AGCGTTCTCAAACGATGGAGAGGGCAAGTCCGTGAGCTCAGGGTTCA<br>TGTAGCGGGCGGCCAGAGGGCTGCCGGTTCTCCGGAGGGCCTCCACG<br>AATTCCTGAGTCCAACCAAGGTGCCAGACTCCCTTCTCCAAGGTGCTC<br>AGCAGCAGTTCAACTGCCTGCATGTTCCCGGAGGTGGCGACTGTCCTC<br>TGAATCTGCTCCTTCACCTCTGCAGGCAGAAAGGTCAGGTAGTCCAGC<br>ACAGGCTCCACCTGGATGTACATTTTACCCTGGCCCTGAAGCACGAG<br>ATGAGATAGCGGAAATTCTCGTCTGTGGAATACCCATTTCGACATTCTC<br>CC       |
| 512C | TAATACGACTCACTATAGGGAGAATGAACACGATTAACATCGCTAAG<br>AACGACTTCTCTGACATCGAACTGGCTGCTATCCCGTTCAACACTCTG<br>GCTGACCATTACGGTGAGCGTTTAGCTCGCGAACAGTTGGCCCTTGAG<br>CATGAGTCTTACGAGATGGGTGAAGCACGCTTCCGCAAGATGTTTGAG<br>CGTCAACTTAAAGCTGGTGAAGTTGCGGATAACGCTGCCGCCAAGCCT<br>CTCATCACTACCCTACTCCCTAAGATGATTGCACGCATCAACGACTGG<br>TTTGAGGAAGTGAAAGCTAAGCGCGGCAAGCGCCCGACAGCCTTCCA<br>GTTCTGCAAGAAATCAAGCCGGAAGCCGTAGCGTACATCACCATTA<br>AGACCACTCTGGCTTGCTAACCAGTGCTGACAATAACAACCGTTCAGG<br>CTGTAGCAAGCGCAATCGGTTCGGGCCATTGAGGACGAGGCTCGCTTC<br>GGTCGTATCCGTGACCTTGAAGCTAAGCACTTCAAGAAAAACGTTGA<br>GGAACCTCTCCC |
| 512D | TAATACGACTCACTATAGGGAGAGTTCCTCAACGTTTTTCTTGAAGTG<br>CTTAGCTTCAAGGTCACGGATACGACCGAAGCGAGCCTCGTCCTCAAT<br>GGCCCGACCGATTGCGCTTGCTACAGCCTGAACGGTTGTATTGTCAGC<br>ACTGGTTAGGCAAGCCAGAGTGGTCTTAATGGTGATGTACGCTACGGC<br>TTCCGGCTTGATTTCTTGCAGGAACTGGAAGGCTGTCGGGCGCTTGCC<br>GCGCTTAGCTTTCACCTCCTCAAACCAGTCGTTGATGCGTGCAATCAT                                                                                                                                                                                                                                                                                |

|                               |                                                                                                                                                                                                                                                                                                                                                                                                                                                                            |
|-------------------------------|----------------------------------------------------------------------------------------------------------------------------------------------------------------------------------------------------------------------------------------------------------------------------------------------------------------------------------------------------------------------------------------------------------------------------------------------------------------------------|
|                               | CTTAGGGAGTAGGGTAGTGATGAGAGGCTTGGCGGCAGCGTTATCCG<br>CAACCTCACCAGCTTTAAGTTGACGCTCAAACATCTTGCGGAAGCGTG<br>CTTCACCCATCTCGTAAGACTCATGCTCAAGGGCCAACTGTTGCGGAG<br>CTAAACGCTCACCGTAATGGTCAGCCAGAGTGTTGAACGGGATAGCA<br>GCCAGTTCGATGTCAGAGAAGTCGTTCTTAGCGATGTTAATCGTGTT<br>ATTCTCCC                                                                                                                                                                                                  |
| 512B-<br>3end                 | GGGAGAATGTCGAATGGGTATTCCACAGACGAGAATTTCCGCTATCTC<br>ATCTCGTGCTTCAGGGCCAGGGTGAAAATTCTCCCTATAGTGAGTCGT<br>ATTA                                                                                                                                                                                                                                                                                                                                                               |
| T7promot<br>er_top_str<br>and | <u>TAATACGACTCACTATAGGG</u>                                                                                                                                                                                                                                                                                                                                                                                                                                                |
| 112A                          | <u>TAATACGACTCACTATAGGGGAGAAGTCCAGCACAGGCTCCACCTGG</u><br>ATGTACATTTTCACCCTGGCCCTGAAGCACGAGATGAGATAGCGGAA<br>ATTCTCGTCTGTGGAATACCCATTCGACATTCTCCC                                                                                                                                                                                                                                                                                                                          |
| 403A                          | <u>TAATACGACTCACTATAGGGAGACACGTGTCTCTAGCAAAACCAGGG</u><br>CCTGAGCATAAGAAGTGGGACCCTTCTAGGCAGGGTGCAGTGGCTCA<br>CGCCTGTAATCCCAGCACTTTGGGAGGCCAGGCAGGCGGATCACCT<br>GAGGTCAGGAGTTCAAGACCAGCCTGACCAACCTGGAGAAACCCCGT<br>CTCTACTAAAAATACAAAAAATTAGCTGGGCGTGGTGGTAGGCACCT<br>GTAATCCCAGCTACTTGGGAGGCTGAGGCAGGAGAATCTCTTGAACC<br>CGGGAAGTGGAGGTTGCGGACCTGAGATCATGCCATTGCACTCCAGC<br>CTGGGCAAGAAGAGCGAAACTCCATCTTAAACAAACAAACAAAAAAA<br>AAAGAACTGGGACCCTTCTGCCATCTGACATAGCCGAATTCCGG |
| 386A                          | <u>TAATACGACTCACTATAGGGAGACAAAGCACATCTCTATCCTTTCTCC</u><br>CAGTTGCCCTCTCCTTTTTTGTGTTTTTTTTTGAGGTTGAGTTTTGCTC<br>TTGTTGCCAGGCTGGAGTGCAATAGTGCAATCTTGGCTAACTGCAAC<br>CTCCGCTCCCAGGTTCAAGCAATTCTCCTGCCTCAGTCTCCCGAGTA<br>GCTGGGATTACAGTCATGCATCACCATGCCTGGCTAATTTTGTATTGT<br>AGTAGAGATGGGGTTTCTCCATGTTGGTCAGGCTGGTCTCAAACACCT<br>GACCTCAGGTGATCTGCCTGCCTTGGCCTTCCAAAGTGCTGGGATTAC<br>AGGCATGAGCCACCGCGCCCGCCTGCCCTTTCCAAGAGATATGCTC<br>AGCATAAGAATTCCGG                       |

\*The T7 promoters are underscored.

\*Sequences described in Figure 3 are not included in this table.

**Table S2.** Sequences of DNA oligonucleotides for RACE.

| oligos for : | oligo name                  | description                                     | sequence (5'-3')                                           |
|--------------|-----------------------------|-------------------------------------------------|------------------------------------------------------------|
| 5' RACE      | Oligo 1                     | RT primer for 512B RNA                          | GGGAGAATGTCTGAATGGGTATTC<br>CACAGACGAGAAT                  |
|              | Oligo 2                     | RT primer for c512B RNA                         | GGGAGAAGCTCTCTTACACCTGAT<br>TCATTTCCATTGTTTTCTG            |
|              | Oligo d(T)-Anchor Primer    | Primer for 2 <sup>nd</sup> cDNA synthesis       | GACCACGCGTATCGATGTCGACTT<br>TTTTTTTTTTTTTTTV (V=A, C or G) |
|              | Oligo 3                     | PCR primers for 512B                            | GGGAGTCTGGCACCTTGG                                         |
|              | PCR Anchor Primer           |                                                 | GACCACGCGTATCGATGTCGAC                                     |
|              | Oligo 4                     | PCR primers for c512B                           | GGGAGAGACTGTCCTCTGAATCT<br>GCTCCTTCACCTCT                  |
|              | PCR Anchor Primer           |                                                 | GACCACGCGTATCGATGTCGAC                                     |
|              | Oligo 3                     | Sequencing primer for 512B                      | GGGAGTCTGGCACCTTGG                                         |
| Oligo 4      | Sequencing primer for c512B | GGGAGAGACTGTCCTCTGAATCT<br>GCTCCTTCACCTCT       |                                                            |
| 3' RACE      | Oligo d(T)-Anchor Primer    | RT primer for poly A added RNA                  | GACCACGCGTATCGATGTCGACTT<br>TTTTTTTTTTTTTTTV (V=A, C or G) |
|              | Oligo 1                     | Primer for c512B 2 <sup>nd</sup> cDNA synthesis | GGGAGAATGTCTGAATGGGTATTC<br>CACAGACGAGAAT                  |
|              | Oligo 2                     | Primer for 512B 2 <sup>nd</sup> cDNA synthesis  | GGGAGAAGCTCTCTTACACCTGAT<br>TCATTTCCATTGTTTTCTG            |
|              | Oligo 3                     | PCR primers for c512B                           | GGGAGTCTGGCACCTTGG                                         |
|              | PCR Anchor Primer           |                                                 | GACCACGCGTATCGATGTCGAC                                     |
|              | Oligo 4                     | PCR primers for 512B                            | GGGAGAGACTGTCCTCTGAATCT<br>GCTCCTTCACCTCT                  |
|              | PCR Anchor Primer           |                                                 | GACCACGCGTATCGATGTCGAC                                     |
|              | Oligo 3                     | Sequencing primer for c512B                     | GGGAGTCTGGCACCTTGG                                         |
| Oligo 4      | Sequencing primer for 512B  | GGGAGAGACTGTCCTCTGAATCT<br>GCTCCTTCACCTCT       |                                                            |
